# Supplementary material for: Dramatic Shifts in Benthic Microbial Eukaryote Communities following the Deepwater Horizon Oil Spill
Source: PubMed Central journal article supplement (PMC3368851; doi:10.1371/journal.pone.0038550), 2012-06-06
Supplement: pone.0038550.s001.pdf [file pone.0038550.s001.pdf]

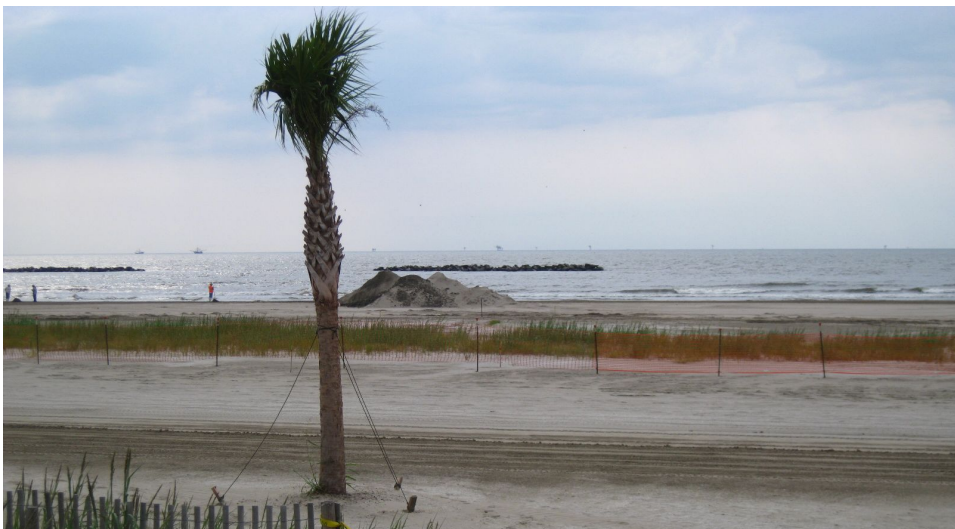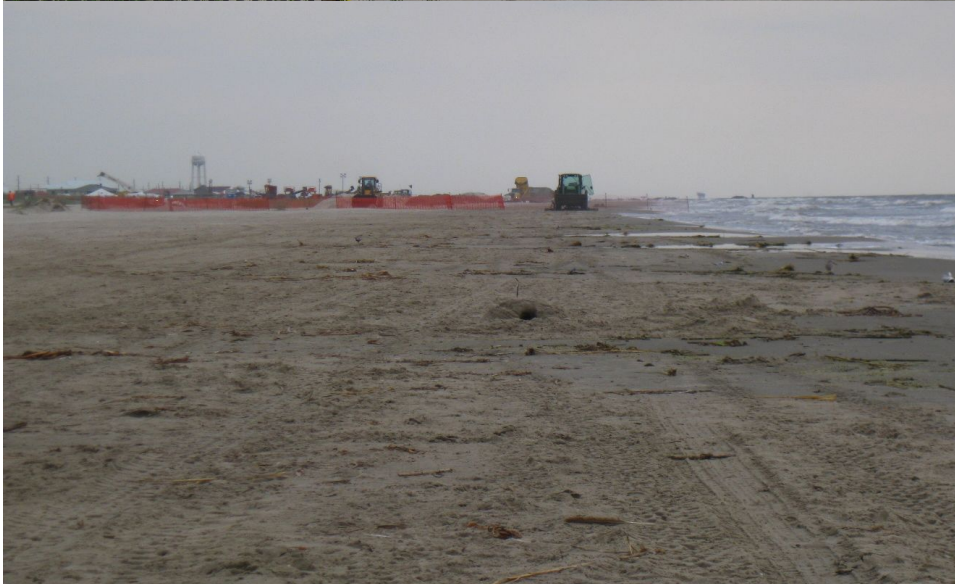

## Post-Spill Sediment Community Grand Isle, LA

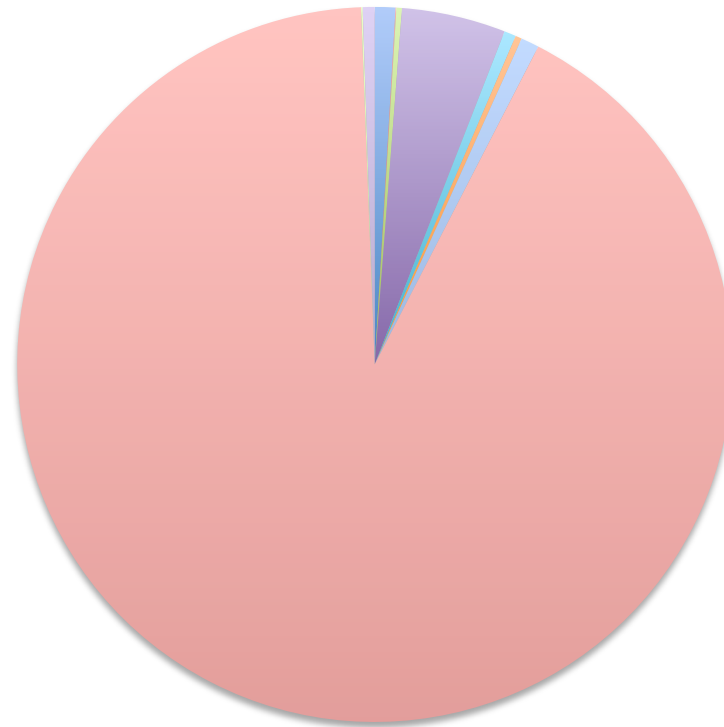

- Nematoda
- Arthropoda
- Unicellular Eukaryotes
- No Match
- Stramenopiles
- Annelida
- Other Metazoa
- Environmental
- Fungi
- Algae
